# Supplementary material for: A high-quality genome assembly of quinoa provides insights into the molecular basis of salt bladder-based salinity tolerance and the exceptional nutritional value
Source: PubMed Central journal article supplement (PMC5674158; doi:10.1038/cr.2017.124), 2017-10-10
Supplement: cr2017124x6.pdf [file cr2017124x6.pdf]

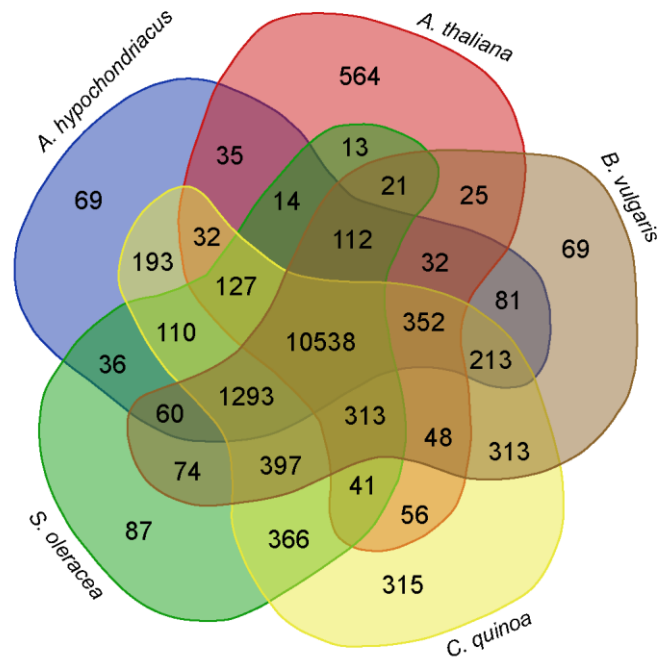

**Supplementary information, Figure S6** Venn diagram showing the overlap of orthologous groups among quinoa and 4 other plant species.
