# Supplementary material for: A high-quality genome assembly of quinoa provides insights into the molecular basis of salt bladder-based salinity tolerance and the exceptional nutritional value
Source: PubMed Central journal article supplement (PMC5674158; doi:10.1038/cr.2017.124), 2017-10-10
Supplement: cr2017124x7.pdf [file cr2017124x7.pdf]

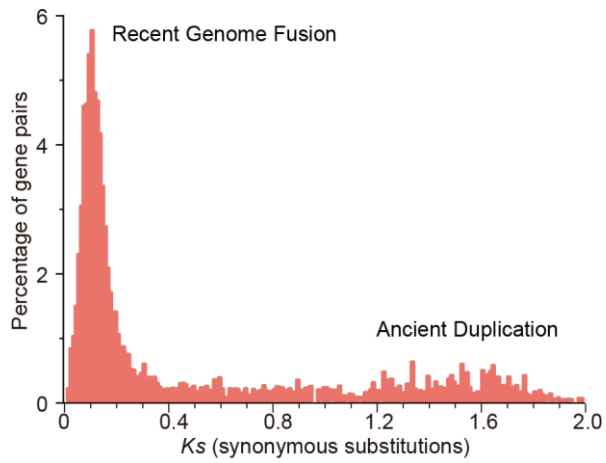

**Supplementary information, Figure S7** Histogram of Ks (synonymous substitution) values for paralogous quinoa gene pairs.

The peaks at  $K_s=0.12$  and  $K_s=1.6$  indicate a recent and an ancient genome duplication respectively.
