# Supplementary material for: A high-quality genome assembly of quinoa provides insights into the molecular basis of salt bladder-based salinity tolerance and the exceptional nutritional value
Source: PubMed Central journal article supplement (PMC5674158; doi:10.1038/cr.2017.124), 2017-10-10
Supplement: cr2017124x10.pdf [file cr2017124x10.pdf]

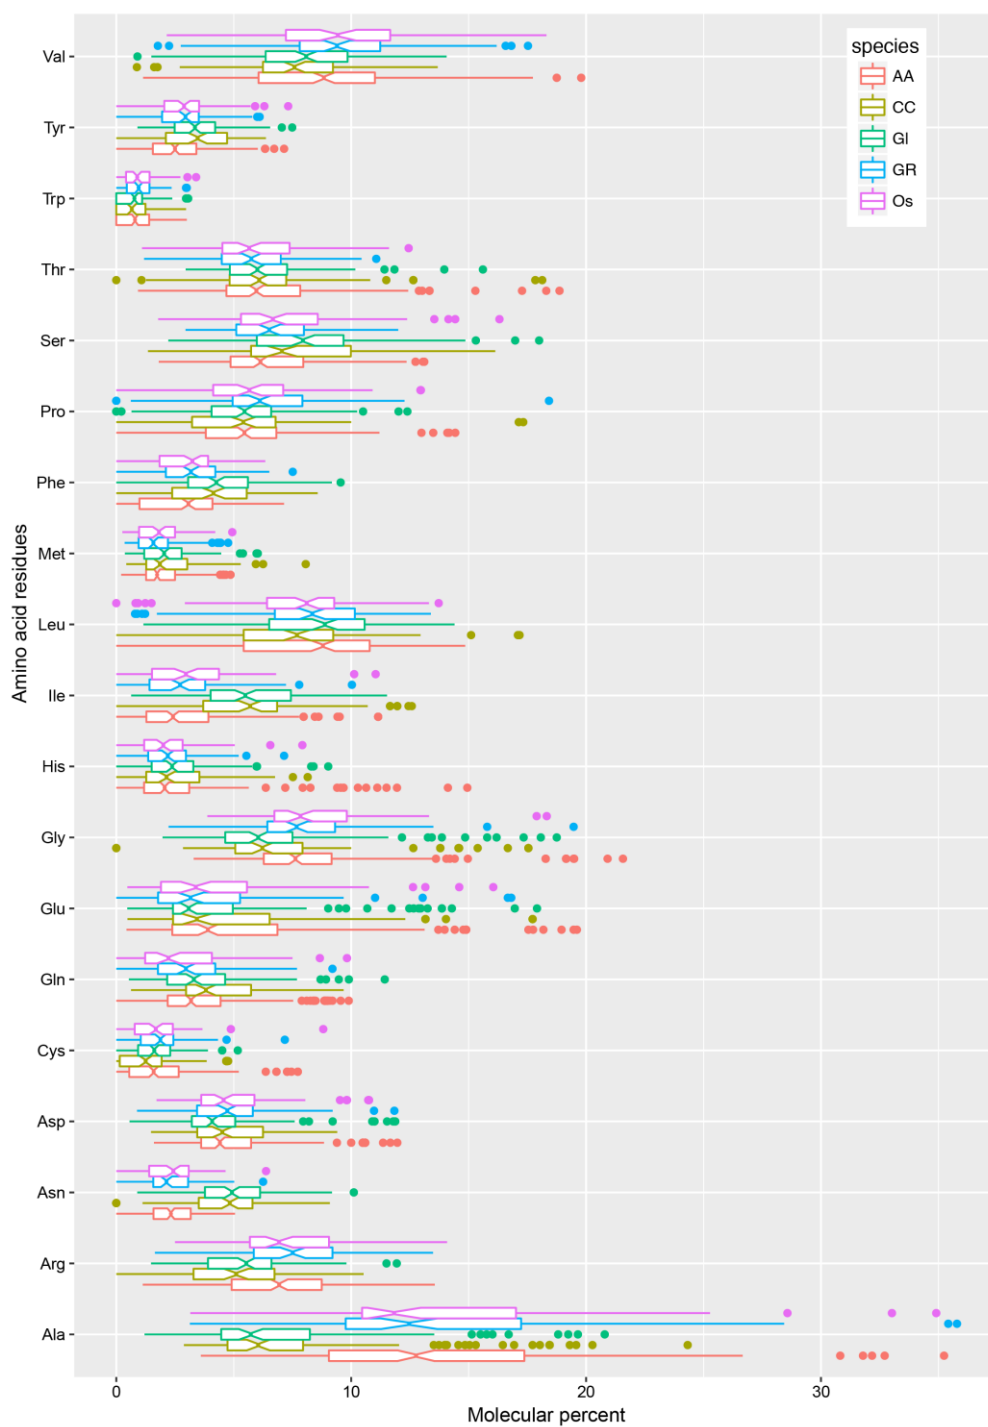

**Supplementary information, Figure S10** Composition of 19 amino acid residues (except Lys) in LEA proteins in five different crops.

AA, *Aegilops tauschii*; CC, *Chenopodium quinoa*; Gl, *Glycine max*; GR, *Zea mays*; Os, *Oryza sativa*.
