# Supplementary material for: A high-quality genome assembly of quinoa provides insights into the molecular basis of salt bladder-based salinity tolerance and the exceptional nutritional value
Source: PubMed Central journal article supplement (PMC5674158; doi:10.1038/cr.2017.124), 2017-10-10
Supplement: cr2017124x20.pdf [file cr2017124x20.pdf]

**Table S4.** Summary of fosmid alignment with published quinoa assemblies

| <b>Fosmids</b>   |               | <b>Cq_real_v1.0 (This study)</b> |                     |              |                 |            | <b>ASM168347v1 (Jarvis et al. 2017)</b> |                     |              |                 |            |
|------------------|---------------|----------------------------------|---------------------|--------------|-----------------|------------|-----------------------------------------|---------------------|--------------|-----------------|------------|
| <b>Fosmid ID</b> | <b>length</b> | <b>Target scaffold</b>           | <b>Target match</b> | <b>score</b> | <b>mismatch</b> | <b>gap</b> | <b>Target scaffold</b>                  | <b>Target match</b> | <b>score</b> | <b>mismatch</b> | <b>gap</b> |
| fosmid1          | 31691         | scaffold_0031                    | 31856               | 31681        | 4               | 171        | C_Quinoa_Scaffold_3525                  | 31864               | 31668        | 9               | 187        |
| fosmid2          | 31421         | scaffold_0094                    | 31877               | 31277        | 102             | 498        | C_Quinoa_Scaffold_1319                  | 31732               | 31260        | 123             | 349        |
| fosmid3          | 33944         | scaffold_0440                    | 34642               | 33796        | 83              | 763        | C_Quinoa_Scaffold_3901                  | 34221               | 33656        | 111             | 454        |
| fosmid4          | 33082         | scaffold_0742                    | 33267               | 33026        | 8               | 233        | C_Quinoa_Scaffold_4480                  | 33359               | 33022        | 30              | 307        |
| fosmid5          | 38339         | scaffold_0103                    | 38545               | 38280        | 29              | 236        | C_Quinoa_Scaffold_3144                  | 38614               | 38249        | 62              | 303        |
| fosmid6          | 30450         | scaffold_0165                    | 30604               | 30333        | 57              | 214        | C_Quinoa_Scaffold_3820                  | 30615               | 30125        | 90              | 400        |
| fosmid7          | 33655         | scaffold_0122                    | 33858               | 33607        | 14              | 237        | C_Quinoa_Scaffold_3298                  | 33898               | 33605        | 22              | 271        |
| fosmid8          | 36137         | scaffold_0270                    | 36334               | 35922        | 82              | 330        | C_Quinoa_Scaffold_1465                  | 36772               | 35800        | 171             | 801        |
| fosmid9          | 30327         | scaffold_0351                    | 30527               | 30193        | 85              | 249        | C_Quinoa_Scaffold_3388                  | 28062               | 27735        | 84              | 243        |
| fosmid10         | 32749         | scaffold_0949                    | 32848               | 32722        | 1               | 125        | C_Quinoa_Scaffold_3107                  | 33245               | 32664        | 27              | 554        |
