# Supplementary material for: A high-quality genome assembly of quinoa provides insights into the molecular basis of salt bladder-based salinity tolerance and the exceptional nutritional value
Source: PubMed Central journal article supplement (PMC5674158; doi:10.1038/cr.2017.124), 2017-10-10
Supplement: cr2017124x22.pdf [file cr2017124x22.pdf]

**Table S6.** Summary of SSRs (simple sequence repeats) identified in quinoa

| <b>Motif</b>    | <b>Counts</b>  | <b>Average length (bp)</b> | <b>Average mismatches (bp)</b> | <b>Counts/Mbp</b> |
|-----------------|----------------|----------------------------|--------------------------------|-------------------|
| Mononucleotide  | 121,810        | 22.8                       | 0.4                            | 91.1              |
| Dinucleotide    | 44,872         | 42.3                       | 1                              | 33.6              |
| Trinucleotide   | 76,221         | 39.5                       | 1.4                            | 57                |
| Tetranucleotide | 46,847         | 20.2                       | 0.3                            | 35.1              |
| Pentanucleotide | 77,059         | 20.6                       | 0.4                            | 57.7              |
| Hexanucleotide  | 25,955         | 26.6                       | 0.7                            | 19.4              |
| <b>Total</b>    | <b>392,764</b> | <b>28.7</b>                | <b>0.7</b>                     | <b>49</b>         |
