# Supplementary material for: A high-quality genome assembly of quinoa provides insights into the molecular basis of salt bladder-based salinity tolerance and the exceptional nutritional value
Source: PubMed Central journal article supplement (PMC5674158; doi:10.1038/cr.2017.124), 2017-10-10
Supplement: cr2017124x24.pdf [file cr2017124x24.pdf]

**Table S8.** Statistics of predicted quinoa gene models at each step of the annotation pipeline

| Method                    | Gene number | Average Length |        |       | Exon per Gene |        |
|---------------------------|-------------|----------------|--------|-------|---------------|--------|
|                           |             | Gene           | CDS    | Exon  |               | Intron |
| Homology                  |             |                |        |       |               |        |
| <i>A. hypochondriacus</i> | 75,952      | 2595.4         | 914.2  | 267.4 | 695.1         | 3.4    |
| <i>A. thaliana</i>        | 68,880      | 2320.5         | 892.7  | 274.8 | 635.2         | 3.2    |
| <i>T. salsuginea</i>      | 73,610      | 2191.7         | 842.4  | 272.9 | 646.7         | 3.1    |
| <i>S. oleracea</i>        | 135,497     | 1944.7         | 817.0  | 288.9 | 616.8         | 2.8    |
| <i>B. vulgaris</i>        | 160,859     | 1869.5         | 791.3  | 303.8 | 671.9         | 2.6    |
| <i>ab initio</i>          |             |                |        |       |               |        |
| Fgenesh                   | 48,208      | 3955.5         | 1197.5 | 203.8 | 565.8         | 5.9    |
| Augustus                  | 63,690      | 2622.8         | 1045.8 | 218.9 | 417.5         | 4.8    |
| Genescan                  | 54,919      | 13792.9        | 1219.3 | 205.7 | 2551.4        | 5.9    |
| GlimmerHMM                | 66,627      | 2280.4         | 879.1  | 226.7 | 487.1         | 3.9    |
| SNAP                      | 101,308     | 1296.2         | 636.7  | 203.6 | 310.0         | 3.1    |
| mRNA-seq                  | 51,172      | 3408.1         | 1104.1 | 231.2 | 534.1         | 4.6    |
| GLEAN                     | 54,438      | 3547.6         | 1096.3 | 232.0 | 560.7         | 4.8    |
