# Supplementary material for: A high-quality genome assembly of quinoa provides insights into the molecular basis of salt bladder-based salinity tolerance and the exceptional nutritional value
Source: PubMed Central journal article supplement (PMC5674158; doi:10.1038/cr.2017.124), 2017-10-10
Supplement: cr2017124x25.pdf [file cr2017124x25.pdf]

**Table S9.** Statistics of noncoding RNAs (ncRNA) identified in the quinoa genome

| Type         | Copy Number   | Average length (bp) | Total length (bp) | Percent genome |
|--------------|---------------|---------------------|-------------------|----------------|
| miRNA        | 192           | 192                 | 24,160            | <0.01          |
| tRNA         | 2934          | 2934                | 215,855           | 0.02           |
| rRNA         |               |                     |                   |                |
| 18S          | 75            | 75                  | 40,787            | <0.01          |
| 28S          | 139           | 139                 | 16,186            | <0.01          |
| 5.8S         | 25            | 25                  | 3,720             | <0.01          |
| 5S           | 1071          | 1071                | 108,263           | 0.01           |
| snRNA        | 5922          |                     |                   |                |
| CD-box       | 5565          | 5565                | 588,244           | 0.04           |
| HACA-box     | 85            | 85                  | 11,254            | <0.01          |
| splicing     | 272           | 272                 | 39,465            | <0.01          |
| <b>Total</b> | <b>10,358</b> |                     | <b>1,047,934</b>  | <b>0.09</b>    |
