# Supplementary material for: A high-quality genome assembly of quinoa provides insights into the molecular basis of salt bladder-based salinity tolerance and the exceptional nutritional value
Source: PubMed Central journal article supplement (PMC5674158; doi:10.1038/cr.2017.124), 2017-10-10
Supplement: cr2017124x26.pdf [file cr2017124x26.pdf]

**Table S10.** Summary of quinoa genes with assigned (predicted) functions

|                       | <b>Number</b> | <b>Percent(%)</b> |
|-----------------------|---------------|-------------------|
| Total predicted genes | 54,459        | 100.0             |
| Annotated             |               |                   |
| InterPro              | 41,060        | 75.4              |
| GO                    | 46,264        | 85.0              |
| KEGG                  | 27,486        | 50.4              |
| Swissprot             | 35,708        | 65.6              |
| TrEMBL                | 47,862        | 87.9              |
| <b>Total</b>          | <b>52,058</b> | <b>95.6</b>       |
